# Supplementary material for: Li 4 Ti 5 O 12 @carbon nanotube arrays as high-performance anode for Li-ion batteries
Source: Royal Society of Chemistry journal article supplement (doi:10.1039/d4ra04421e), 2024-01-01
Supplement: d4ra04421e1.pdf [file d4ra04421e1.pdf]

## Supporting Information

### $\text{Li}_4\text{Ti}_5\text{O}_{12}$ /carbon nanotube arrays as high-performance anode for Li-ion batteries

Bin Zhu,<sup>a</sup> Yi Pu,<sup>a</sup> Wu Tang<sup>\*a</sup> and Hui Tang<sup>\*a</sup>

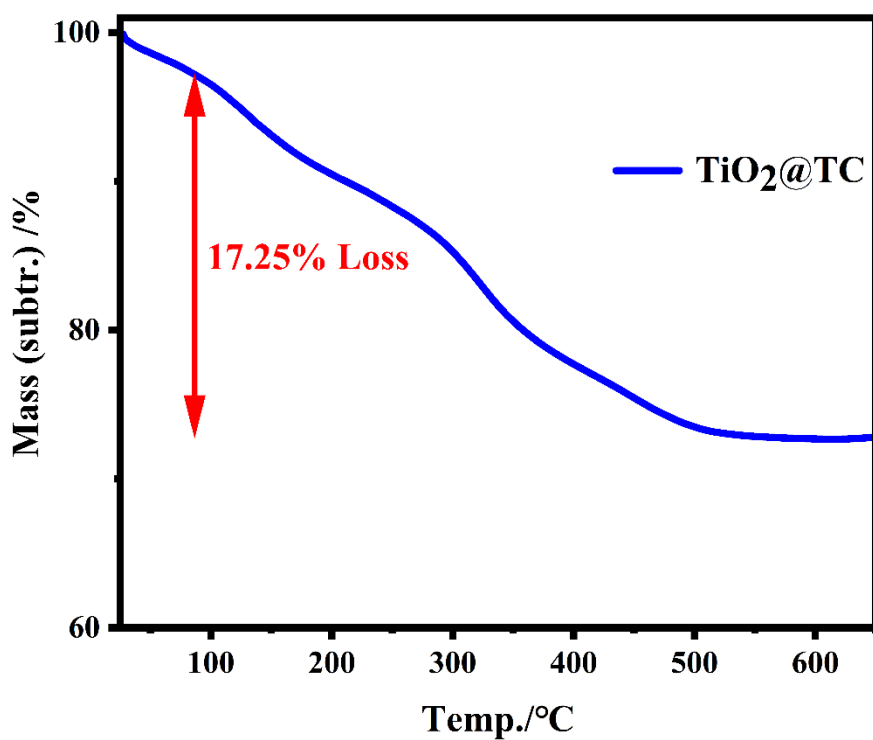

Fig. S1 TG curve of LTO@C.
